# Supplementary material
Source: PubMed Central journal article supplement (PMC3053961)
Supplement: 1018301108_pnas.201018301SI.pdf [file 1018301108_pnas.201018301SI.pdf]

# Supporting Information

Wei et al. 10.1073/pnas.1018301108

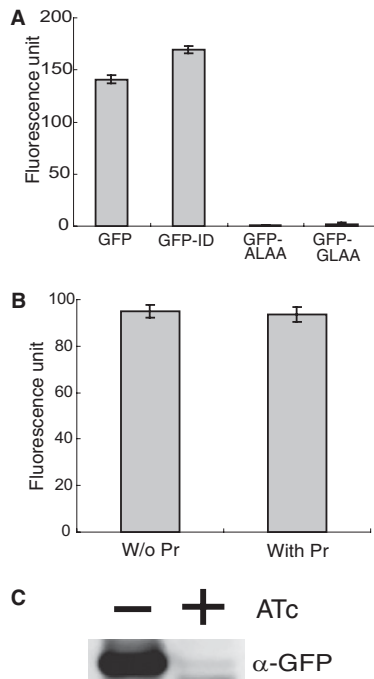

**Fig. S1.** GFP is conditionally degraded when HIV protease is expressed. (A) Fluorescence of WT GFP (GFP), GFP fused to the inducible degradation (ID) tag (GFP-ID), GFP fused to the WT mycobacterial SsrA tag (GFP-ALAA), or a mutated SsrA tag (GFP-GLAA). *Mycobacterium smegmatis* mc<sup>2</sup>155 containing pMV261kan::GFP, pMV261kan::GFP-ID, pMV261kan::GFP-mycoSsrA(ALAA), or pMV261kan::GFP-mycoSsrA(GLAA) was cultured overnight from a starting OD<sub>600</sub> = 0.02 (calculated). Additionally, fluorescence was determined. (B) GFP-ID is stable in the absence of protease expression. *M. smegmatis* mc<sup>2</sup>155 with pMV261hyg::GFP-ID with or without pMC1s::WT-HIV2Pr was grown from a starting OD<sub>600</sub> = 0.02 (calculated). Overnight and fluorescence was determined. Values represent mean  $\pm$  SD of triplicate samples. (C) Western blot of the GFP-ID strain grown with or without added anhydrotetracycline (ATc). Western blot analysis was performed as described in *Methods*.



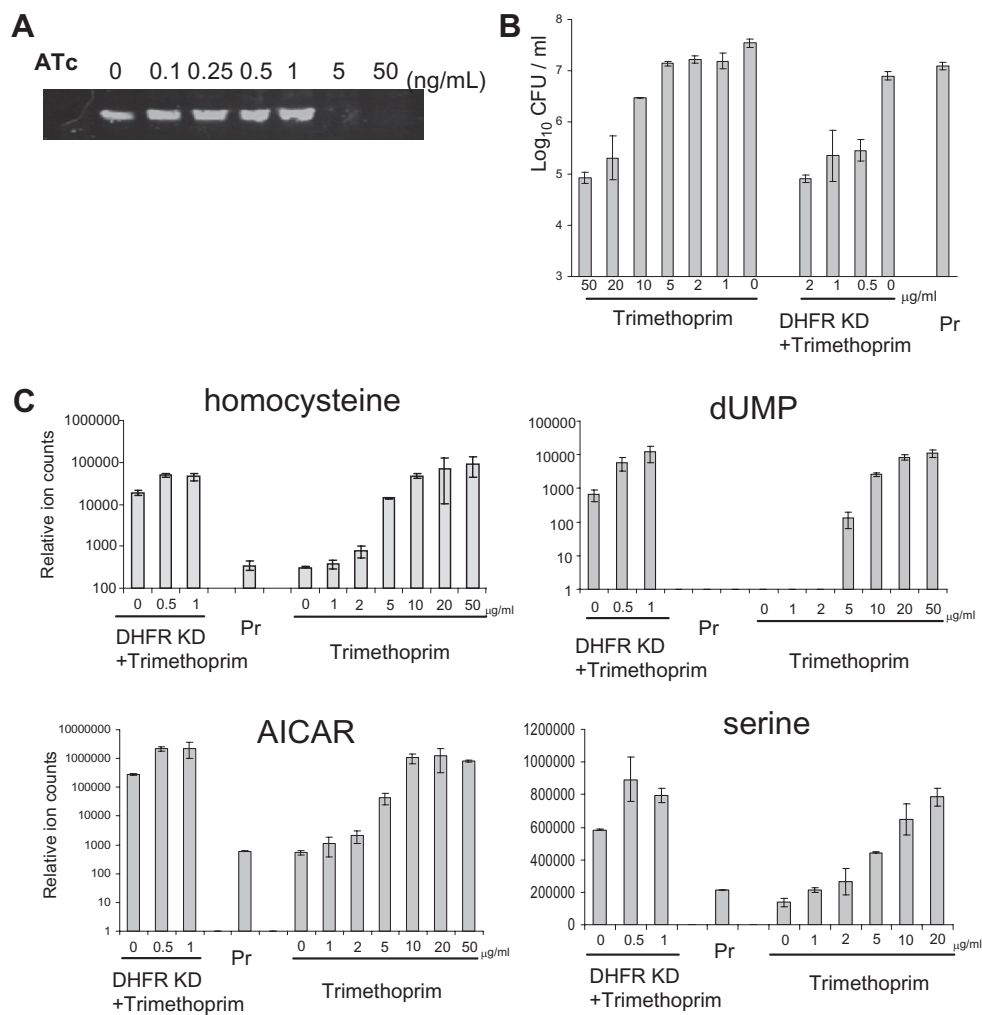

**Fig. S5.** Metabolomic profile of dihydrofolate reductase (DHFR) depletion and trimethoprim-treated *M. smegmatis*. (A) Western analysis of DHFR-depleted cells grown on nitrocellulose filters; 5 ng/mL inducer (ATc) are sufficient to deplete DHFR below the level of detection. (B) cfu of overnight cultures grown on nitrocellulose filter. Prs are cells expressing the HIV-2 protease in a WT background. Except Pr, the rest of the cultures are in a background where DHFR has been ID-tagged and a HIV-2 protease may be expressed *in trans*. DHFR-KD + trimethoprim cells are induced and depleted for DHFR in the presence of different concentrations of trimethoprim. Trimethoprim cells are not depleted for DHFR but treated with various concentrations of trimethoprim.

**Table S1. Plasmids used in this work**

|                                            | Relevant genotype/sequence                                                                                                                                 | Source or reference              |
|--------------------------------------------|------------------------------------------------------------------------------------------------------------------------------------------------------------|----------------------------------|
| pMC1s                                      | Integrated mycobacterial <i>E. coli</i> shuttle plasmid (L5 site) has TetR repressor; Kan <sup>R</sup>                                                     | 1                                |
| pMC1s::WT-HIV2Pr*                          | Integrating plasmid (L5 site), tet-inducible, contains codon-optimized HIV-2 protease; Kan <sup>R</sup>                                                    | This work (GenBank no. GU459075) |
| pMV261                                     | Episomal plasmid; Kan <sup>R</sup>                                                                                                                         | 2                                |
| pMV261kan::GFP <sup>†</sup>                | Derived from pMV261 and contains GFP from GFPmut3; Kan <sup>R</sup>                                                                                        | This work (GenBank no. GU459078) |
| pMV261kan::GFP-ID <sup>‡</sup>             | Derived from pMV261 and contains GFP with ID tag; Kan <sup>R</sup>                                                                                         | This work (GenBank no. GU459077) |
| pMV261kan::GFP-mycoSsrA(ALAA) <sup>†</sup> | Derived from pMV261 and contains GFP with WTTB SsrA tag; Kan <sup>R</sup>                                                                                  | This work (GenBank no. GU459081) |
| pMV261kan::GFP-mycoSsrA(GLAA) <sup>†</sup> | Derived from pMV261 and contains GFP with mutated TB ssrA tag (A to G); Kan <sup>R</sup>                                                                   | This work (GenBank no. GU459076) |
| pMV261hyg::GFP-ID <sup>‡</sup>             | Derived from pMV261 and contains GFP with ID tag; Hyg <sup>R</sup>                                                                                         | This work (GenBank no. GU459074) |
| pGH1000A                                   | Integrating plasmid (Giles site); Hyg <sup>R</sup>                                                                                                         | Gift from Graham Hatfull (3)     |
| pGH1000A::zeo-ID <sup>§</sup>              | Derived from pGH1000A and contains Zeocin resistance gene with ID tag; Hyg <sup>R</sup>                                                                    | This work (GenBank no. GU459079) |
| pBluescriptK5+                             | Cloning plasmid for general purpose; Amp <sup>R</sup>                                                                                                      | Stratagene                       |
| pBKS::zeo-ID-hyg <sup>¶</sup>              | Derived from pBluescriptK5+ and contains Zeocin resistance gene with ID tag and hygromycin resistance gene cassette; Amp <sup>R</sup> and Hyg <sup>R</sup> | This work (GenBank no. GU459080) |
| pUC57::alr-design <sup>  </sup>            | Synthesized flanking DNA sequence of alr in pUC57; Amp <sup>R</sup>                                                                                        | This work                        |
| pUC57::dfrA-design <sup>  </sup>           | Synthesized flanking DNA sequence of dfrA in pUC57; Amp <sup>R</sup>                                                                                       | This work                        |
| pUC57::inhA-design <sup>  </sup>           | Synthesized flanking DNA sequence of inhA in pUC57; Amp <sup>R</sup>                                                                                       | This work                        |
| pUC57::kasA-design <sup>  </sup>           | Synthesized flanking DNA sequence of kasA in pUC57; Amp <sup>R</sup>                                                                                       | This work                        |
| pUC57::alr-ID-hyg                          | ID-hyg DNA cassette inserted into pUC57::alr-design; Amp <sup>R</sup> and Hyg <sup>R</sup>                                                                 | This work                        |
| pUC57::dfrA-ID-hyg                         | ID-hyg DNA cassette inserted into pUC57::dfrA-design; Amp <sup>R</sup> and Hyg <sup>R</sup>                                                                | This work                        |
| pUC57::inhA-ID-hyg                         | ID-hyg DNA cassette inserted into pUC57::inhA-design; Amp <sup>R</sup> and Hyg <sup>R</sup>                                                                | This work                        |
| pUC57::kasA-ID-hyg                         | ID-hyg DNA cassette inserted into pUC57::kasA-design; Amp <sup>R</sup> and Hyg <sup>R</sup>                                                                | This work                        |
| pNit-1                                     | Nitrile-inducible, episomal mycobacterial <i>E. coli</i> shuttle plasmid; Kan <sup>R</sup>                                                                 | 4                                |
| pNit::ET                                   | Derived from pNit-1, recombinase from phage che9, <i>sacBR</i> from <i>Bacillus</i> for counter selection; Kan <sup>R</sup>                                | This work (GenBank no. GU459073) |

\*pMC1s::WT-HIV2Pr is an integrating tetracycline(tet)-inducible plasmid (1) that encodes the codon-optimized HIV-2 protease (GenBank no. GU459075). The original HIV-2 protease sequence was a gift from Phyllis Kanki and Nzovu (Harvard School of Public Health, Boston) We subsequently synthesized a codon-optimized version to improve expression in mycobacteria.

<sup>†</sup>pMV261kan::GFP (GenBank no. GU459078), pMV261kan::GFP-ID (GenBank no. GU459077), pMV261kan::GFP-mycoSsrA(ALAA) (GenBank no. GU459081), and pMV261kan::GFP-mycoSsrA(GLAA) (GenBank no. GU459076) are pMV261(2)-based episomal plasmids in which the GFP open-reading frame is fused with different tags.

<sup>‡</sup>pMV261hyg::GFP-ID (GenBank no. GU459074) is a pMV261hyg-based plasmid in which the GFP open-reading frame is fused with the ID tag.

<sup>§</sup>pGH1000A::zeo-ID (GenBank no. GU459079) is a pGH1000A-based plasmid in which Zeocin resistance gene is fused with the ID tag.

<sup>¶</sup>pBKS::zeo-ID-hyg (GenBank no. GU459080) is a pBluescript plasmid with zeo-ID and a hygromycin resistance gene used for generating substrate PCR for recombineering.

<sup>||</sup>pUC57::alr-design, pUC57::dfrA-design, pUC57::inhA-design, and pUC57::kasA-design are plasmids containing synthesized DNA fragments that correspond to the flanking region of target genes. DNA fragments containing ID-hyg (ID tag with hygromycin cassette) from pBKS::zeo-ID-hyg (ID tag with hygromycin cassette) from pBKS::zeo-ID-hyg were digested and inserted into each of them with appropriate restriction enzymes. The sequence of synthesized DNA fragments is listed in [Table S3](#).

1. Guo XV, et al. (2007) Silencing *Mycobacterium smegmatis* by using tetracycline repressors. *J Bacteriol* 189:4614–4623.

2. Stover CK, et al. (1991) New use of BCG for recombinant vaccines. *Nature* 351:456–460.

3. Morris P, Marinelli LJ, Jacobs-Sera D, Hendrix RW, Hatfull GF (2008) Genomic characterization of mycobacteriophage Giles: Evidence for phage acquisition of host DNA by illegitimate recombination. *J Bacteriol* 190:2172–2182.

4. Pandey AK, et al. (2009) Nitrile-inducible gene expression in mycobacteria. *Tuberculosis (Edinb)* 89:12–16.

**Table S2. Primers used in this work**

| Name       | Sequence (5' to 3')                                                              |
|------------|----------------------------------------------------------------------------------|
| gyrA-mycF1 | GACGAGGCGGCCGAGTCGATCAGCGAATCCGACGCGGACACCGCCGAGTCACCCGAGGCGGAGCAGAAGCTGATCTCGGA |
| gyrA-mycF2 | CGCTTGATGAACCTGGCCGAGGGCGACACTGATTGCCATCGCCGCAACGCGGACGAGGACGAGGCGGCCGAGT        |
| gyrA-hygR1 | TTGGGTGAACTCACCTACAGTCCTTAGCTCGGGCCGAGGACCTTTCGGGGACCTCAGCGGATCAGCTAGAGGGGCGTC   |
| gyrA-hygR2 | CCCGGACCCGTGCCGTTGGTGGCGCCCCGGTCCCCGCGCGGGTATCCCGGCTCGTTGGGTGAACTCACCTACAG       |
| rpoB-mycF1 | GCCGCGAACCTGGGAATCAACCTGTCGCGCAACGAATCCGCGTCCGTCGAGGATCTCGCGGAGCAGAAGCTGATCTCGGA |
| rpoB-mycF2 | TCCAGCGACGGCGCGGCGATCGAGATGCGTGACGGTGACGACGAGGACCTGGAGCGCGCTGCCGCGAACCTGGGAATC   |
| rpoB-hygR1 | GTAATCCCTTTCCCTTGCGGGTGTGAACTTGACTACTGAGGCGGTCTTCGGACGAGGATCAGCTAGAGGGGCGTC      |
| rpoB-hygR2 | GATGTGTCGCCGGTTCGCGAGACCGATGCGGAGTTCATCGAAGAAGTTGACGTCTAGCACGTAACCTCCCTTTCCCTTGC |
| dfrAF      | TGCGATGGCACTGGCGCGGG                                                             |
| dfrAR      | GCCTTCCAATCCCGCTCGTA                                                             |
| alrF       | GGACGCGGACGACGTGGCC                                                              |
| alrR       | ACGCCGTCGTCGGTGGTGATC                                                            |
| inhAF      | CGGTGCGCTGGGCGAC                                                                 |
| inhAR      | TCGCGACGATCAGGTCCC                                                               |
| kasAF      | GGTGGCTGGAATCGATCC                                                               |
| kasAR      | CCGGCAGGTTGTA CTCTC                                                              |

**Table S3. Sequence of synthesized DNA fragments for pUC57::alr-design, pUC57::dfrA-design, pUC57::inhA-design, and pUC57::kasA-design**

|             | Sequence                                                                                                                                                                                                                                                                                                                                                                                                                                                   |
|-------------|------------------------------------------------------------------------------------------------------------------------------------------------------------------------------------------------------------------------------------------------------------------------------------------------------------------------------------------------------------------------------------------------------------------------------------------------------------|
| alr-design  | GGACGCGGACGACGTGGCCGTAGGTGACGACGCCATCCTGTTCGGCCCCGGCG<br>CCAACGGCGAACCGACCGCGCAGGACTGGGCCGAACCTGCTCGACACCAATTCA<br>CTACGAGGTCGTACGAGCCCGCGGGACGCGTCACGCGCACGTATCTCCGG<br>CAGGACAACAAGAT <u>ggatccCGCctcgag</u> GCGCGCGATGGCTTGCCGGCTGGCC<br>GGGCTGGCCGTGTGCGCACCGTGGCAGGTGTGTGATCGCGCGCTCGCTCA<br>CCTTGCGGGTGAGCAAGGAAGACCCCTACGCCGGTGAGGATTCGAGTGCT<br>CGACGCCGATCGCAGCTCGGTGATCACCACCGACGACGGCGT                                                         |
| dfrA-design | TGCGATGGCACTGGCGGGCCGACCGCTGTGAGGTCACCGAGTTCGACAT<br>CGCCCTGACGCCACTCGACGGTGATGCGCGCGCACCGGTGCTCGACGAC<br>TCGTGGGTGCGACGACGGGTGAGTGGCAGACCACTACGTACGGCCT<br>GCGTTTCCGGTTCTGACGTACCGCGC <u>gcatccCGCctcgag</u> CGAACTCCAGC<br>GAGACCACTCCAGGCTCGGTACATTGTTCCGGGTGAGCAGGAGAGGTGC<br>TCCGCCATGACTGAGTCTCGATTGCTGCTACTGCGTGAGCGCGGAGT<br>CTGCAGCCCAATGACACCGGTTACATTGTTGATTACGAGCGGGATT<br>GGGAAAGC                                                            |
| inhA-design | GGCGGTGCGCTGGGCGACGAGGCCGGCCAGCAGATGCAGCTGCTCGAAGA<br>GGGCTGGGATCAGCGCGCCGCTGGGCTGGAACATGAAGGACCCGACGC<br>CCGTCGCCAAGACCGTGTGCGCACTGCTGTCGGACTGGCTGCCGGCCACCA<br>CCGGCACCGTGATCTACGCCGACGGCGGCCAGCACGACGCTG<br>TT <u>ggatccCGCctcgag</u> CCGTGTCGTTGACGCCTTGCTGCTGCTGTCGTTCCG<br>CGGGCCGGAAGCTCCCGAGCAGGTGATGCCGTTCTTGAGAACTCACCA<br>GGGGCCGCGAATCCCAGGGAGCGGCTGGAATCGGTGGCCGAGCACT<br>ATCTGCACTTCGGCGGGGTGCACCGATCAACGGCATCAACC<br>GGGACCTGATCGTCGCGA     |
| kasA-design | GGTGCCTGGAATCGATCCTCACGGTCTGGCTCTCCGCGACGGCGTCATCCC<br>CCGACGCTGAACACGAGACCCCGATCCCGAGATCGATCTCGATATCGTT<br>GCAGGTGAGCCTCGGTACGGCGAATAACAAGTACGCCATCAACAACCTCGTTC<br>GGGTTCGGCGGCCACAATGTGGCTCTGGCATTGGGGCGTTA <u>cgatctGCTCAGctc</u><br><u>gag</u> GTAAGGAAAGAATCGCGTAAATATGGCGCACTGTCCACGGGGAACGGG<br>CTCCCAACGTGTCGTACCGGCGTTGCGATGACGACAGCGCTGGCGACGGA<br>TCGGAAAGCACCTGGAAGAAGCTGCTCGACGGCCAGAGCGGTATCCGTAC<br>GTCACGGATCCGTTCTGTCGAGGAGTACAACCTGCCGG |

The underlined sequences are designed restriction enzyme sites.
